# Supplementary material for: Genetically Encoded Sensor Cells for the Screening of Glucocorticoid Receptor (GR) Effectors in Herbal Extracts
Source: MDPI journal article supplement (doi:10.3390/bios11090341), 2021-09-16
Supplement: s1 [file s1]

## Article

# Genetically Encoded Sensor Cells for the Screening of Glucocorticoid Receptor (GR) Effectors in Herbal Extracts

Chungwon Kang <sup>1</sup>, Soyoun Kim <sup>1</sup>, Euiyeon Lee <sup>1,2</sup>, Jeahee Ryu <sup>1</sup>, Minhyeong Lee <sup>1</sup> and Youngeun Kwon <sup>1,\*</sup>

<sup>1</sup> Department of Biomedical Engineering, Dongguk University, Seoul 04620, Korea; iu8974@dgu.ac.kr (C.K.); youn3256@gmail.com (S.K.); euiyeon.lee@dongguk.edu (E.L.); annlove7@dongguk.edu (J.R.); 2017126656@dgu.ac.kr (M.L.)

<sup>2</sup> Department of Chemistry and Chemical Biology, Rutgers University, Piscataway, NJ 08854, USA

\* Correspondence: ykwon@dongguk.edu; Tel.: +82-31-961-5151

## Protein sequence

### GR-Npuc-mNESc (1)

Expected Mass (kDa): 90.57

Sequence:

MDSKESLTPGREENPSSVLAQERGDVMDFYKTLRGGAT-  
VKVSASSPSLAVASQSDSKQRRLLVDFPKGSVSNAQQPDLSKAVSLSMGLYMGETETK  
VMGNDLGFPQQGQISLSSGETDLKLEESIANLNRSTSVPEN-  
PKSSASTAVSAAPTEKEFPKTHSDVSSEQQHLKGQTGTNGGNVKLYTTDQSTFDILQD  
LEFSSGSPGKETNESPWRSDLLIDENCLLSPLAGEDDSFLLEGNSNEDCK-  
PLILPDTKPKIK-  
DNGDLVLSSPSNVTLTPQVKTEKEDFIELCTPGVIKQEKLGTVYQCASFPGANIIGNKMS  
AIVHGVSTSGGQMYHYDMNTASLSQQQDQKPIFNVIPPIVGSSENWN-  
RCQGSDDNLTSLGTLNFPGRTVFSNGYSSPSMRPDVSSPPSSSTATTGPPPKLCLVCS  
DEASGCHYGVLTCGSKVFFKRAVEGQHNYLCAGRNDCCIIRKKNCPACRYRK-  
CLQAGMN-  
LEARKTKKKIKGIQQATTGVSQETSENPNGNKTIVPATLPQLTPTLVSLLEVIEPEVLYAG  
YDSSVPDSTWRIMTTLNMLGGRQVIAAVKWAKAIPG-  
FRNLHLDDQMTLLQYSWMFLMAFAL-  
GWRSYRQSSANLLCFAPDLIINEQRMTPCMYDQCKHMLYVSSELHRLQVSYEEYLC  
MKTLLLLSSVPKDGLKSQELFDEIRMTYIKELGKAIVKREGNSSQNWQRFYQLT-  
KLLDSM-  
HEVVENLLNYCFQTFLDKTMSEFPEMLAEIITNQIPKYSNGNIKKLLFHQKLEIKIATR  
KYLKGQNVYDIGVERDHNFAKNGFIASNCFNLSL

### mCherry-mNES<sub>N</sub>-Np<sub>UN</sub>-NLS (2)

Expected Mass (kDa): 44.29

Sequence:

MVSKGEEDNMAIIEKFMRFKVHMEGSVNGHE-  
FEIEGEGEGRPYEGTQAKLKVTGKG-  
PLPFAWDILSPQFMYGSKAYVKHPADIPDYKLKSFPEGFKWERVMNFDGGVVTVTQ  
DSSLQDGEFIYKVKLRGTNFPDGPVMQKKTMGWEASSERMYPEDGALKGEIKQRL-  
KLKDGGHYDAEVKTTYKAKKPVQLPGAYNVNIKLDITSHNEDYTIVEQHERAEGRHS  
TGGMDELYKPRKVYPILRLCLSYETEILTVEYGLLPYGKIVEKRIECTVYSVDNNGNI-  
YTQPVAQWHDRGEQEVFEYCLEDGSLIRATKDHKFMTVDGQMLPIDEIFERELDLMR  
VDNLNPNIKIATRKYLGKQNVYDIGVERKRPAATKKAGQAKKKKLD

### mCherry-mNES<sub>N</sub>-mNp<sub>UN</sub>-NLS (3)

Expected Mass (kDa): 44.25

Sequence:

MVSKGEEDNMAIIEKFMRFKVHMEGSVNGHE-  
FEIEGEGEGRPYEGTQTAKLKVTKGGPLPFAWDILSPQFMYG-  
SKAYVKHPADIPDYLKLSFPEGFKWERVMNFDGGVVTVTQDSSLQDGEFI-  
YKVKLRGTNFPDGPVMQKKTMGWEASSERMYPEDGALKGEIKQRL-  
KLKDGGHYDAEVKTTYKAKKPVQLPGAYNVNI-  
KLDITSHNEDYTIVEQHERAEGRHSTGGMDELYKPRKVYPILRLALSYTEILTVEY-  
GLLPYGKIVEKRIECTVYSVDNNGNIYTQPVAAQWHDRGEQEVFEYCLEDGSLIRAT-  
KDHKFMTVDGQMLPIDEIFERELDLMRVDNLPNIKIATRKYL-  
GKQNVYDIGVERKRPAATKKAGQAKKKKLD

**GR-Npuc-mNEsc-2xFLAG (4)**

Expected Mass (kDa): 92.72

Sequence:

MDSKESLTPGREENPSSVLAQERGDVMDFYKTLRGGAT-  
VKVSASSPSLAVASQSDSKQRRLLVDFPKGSVSNAQQPDLSKAVSLSMGLYMGE-  
TETKVMGNDLGFPQQGQISLSSGETDLKLLSESIANLNRSTSVPEN-  
PKSSASTAVSAAPTEKEFPKTHSDVSSEQQHLKGQTGTNGGNVKLYTTDQSTFD-  
ILQDLEFSSGSPGKETNESPWRSDDLIDENCLLSPLAGEDDSFLLLEGNSNEDCK-  
PLILPDTKPKIKDNG-  
DLVLSSPSNVTLTPQVKTEKEDFIELCTPGVIKQEKLGTVYQCASFPGANIIGNK-  
MSAISVHGVSTSGGQMYHYDMNTASLSQQQDQKPIFNVIPPIPVGSENWN-  
RCQGSDDNLTSLGTLNFPGRTVFSNGY-  
SSPSMRPDVSSPPSSSSTATTGPPPKLCLVCSEASGCHYGVLTCGCKVFFKRAVE-  
GQHNYLCAGRNDCHDKIRRNCPACRYRKCLQAGMNLEARKTKKKIKGIQQATT-  
GVSQETSENPKNKTIVPATLPQLTPTLVSLLEV-  
IEPEVLYAGYDSSVPDSTWRIMTTLNMLGGRQVIAAVKWAKAIPG-  
FRNLHLDDQMTLLQYSWMFLMAFALGWRYSYRQSSANLLCFAPDLI-  
INEQRMTLPCMYDQCKHMLYVSSELHRLQVSY-  
EEYLCMKTLTLLSSVPKDGKLSQELFDEIRMTYIKELGKAIV-  
KREGNSSQNWQRFYQLTKLLDSMHEVVENLLNYCFQTFDKTMSIEFPEMLAEIIT-  
NQIPKYSNGNIKKLLFHQKLEIKIATRKYLGKQNVYDIGVERDHNFALKNG-  
FIASNCFNLSASDYKDDDDKDYKDDDDK

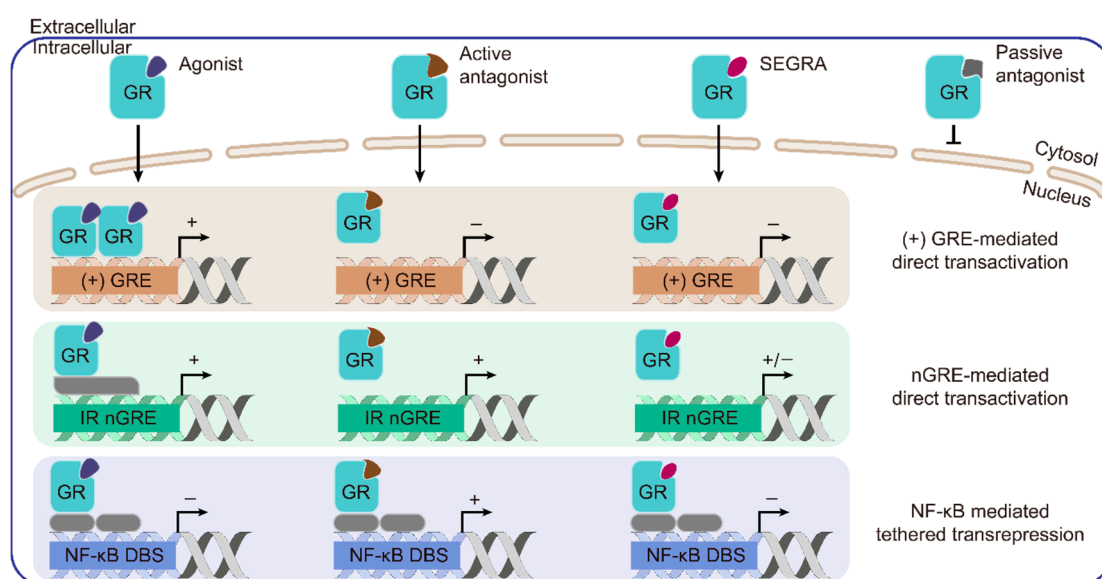

**Scheme S1.** A schematic illustration of the mode of GR gene regulation. Plus (+) indicates stimulation of gene expression and minus (-) in GRE or nGRE mediated GR transactivation suggests no effect on gene while the minus (-) in NF-κB mediated tethered transrepression implies repression of gene expression.

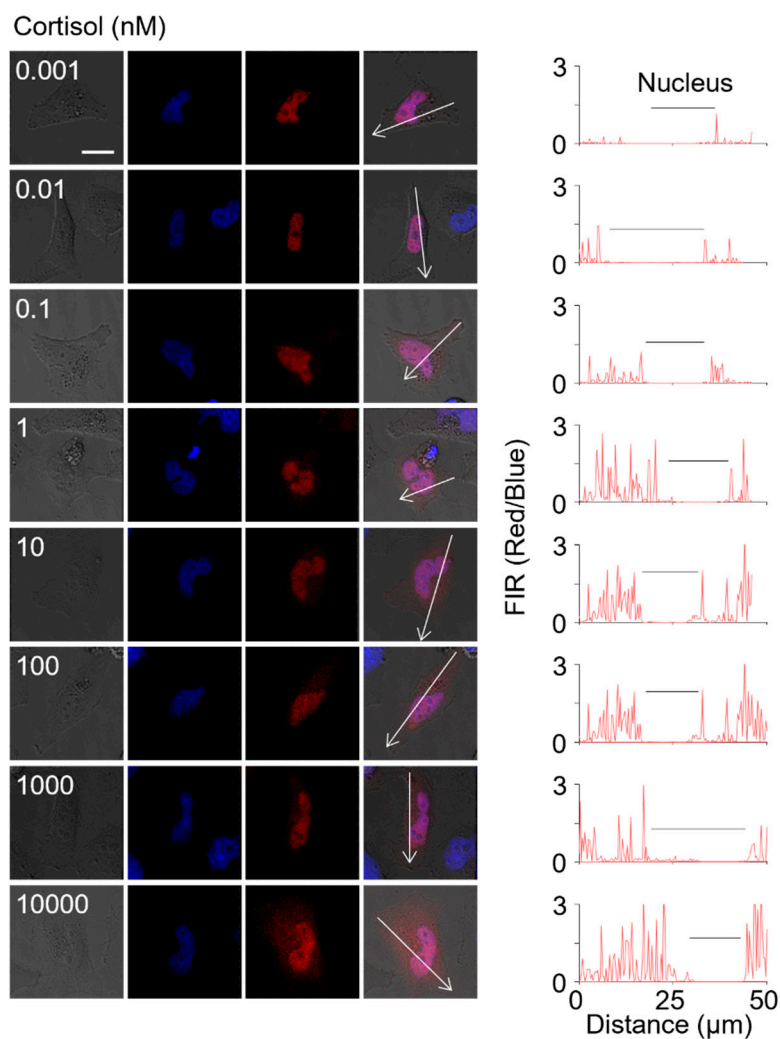

**Figure S1.** Dose-dependent treatment of cortisol to sensor cells. Cortisol was treated to the sensor cell by concentration and analyzed (scale bar =  $20\mu\text{m}$ ).

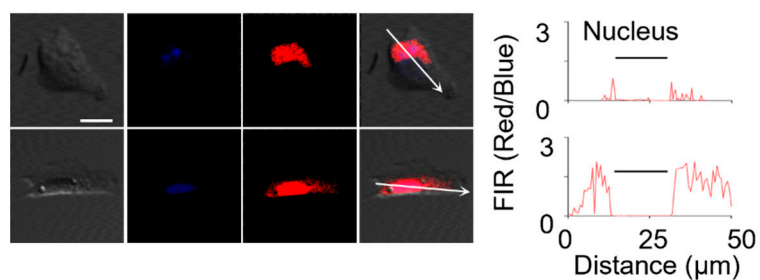

**Figure S2.** Detection of salivary cortisol using sensor cell. The sensor cells responded to Cort in human saliva with estimated Cort-concentration of 13 nM.

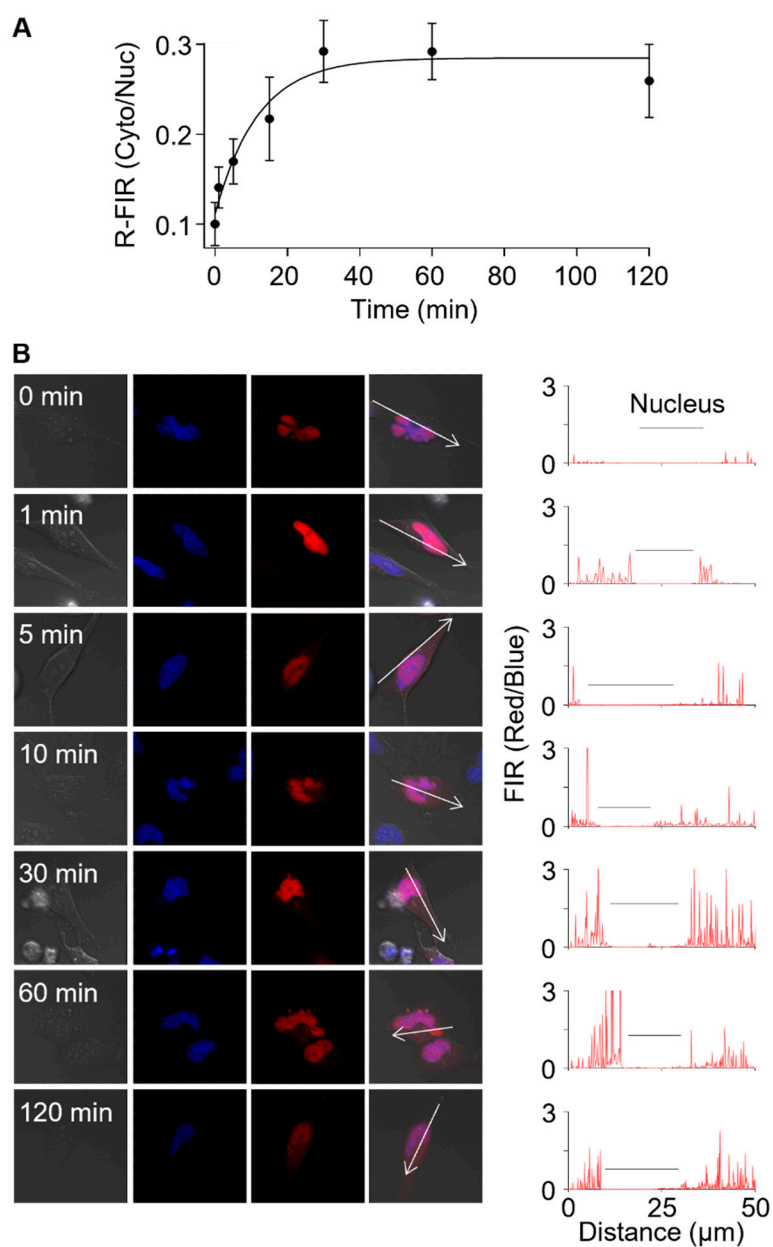

**Figure S3.** Time-dependent treatment of cortisol to sensor cells. (A) Time-dependent of R-FIR Cyto/Nuc signal was plotted and the limit of detection. (B) The sensor cells were treated with 10  $\mu\text{M}$  of cortisol depending on time. (scale bar = 20 $\mu\text{m}$ )..

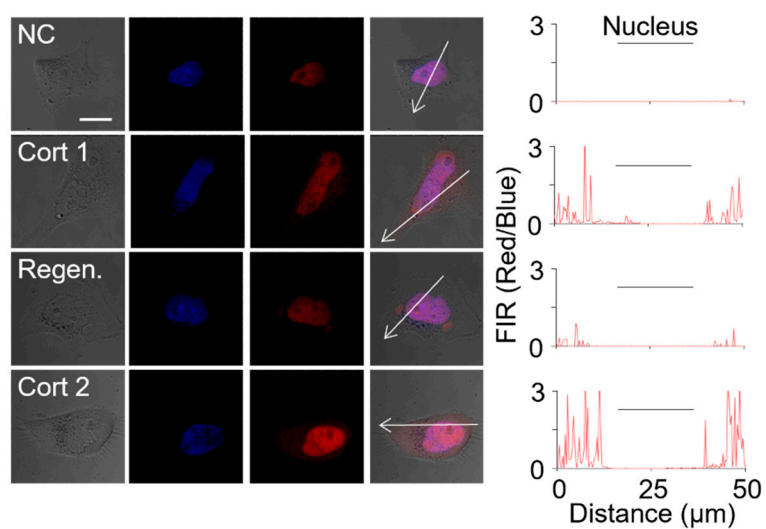

**Figure S4.** Renewability of sensor cell. Sensor cells were exposed to repetitive 10  $\mu$ M of cortisol with time intervals (scale bar = 20  $\mu$ m).

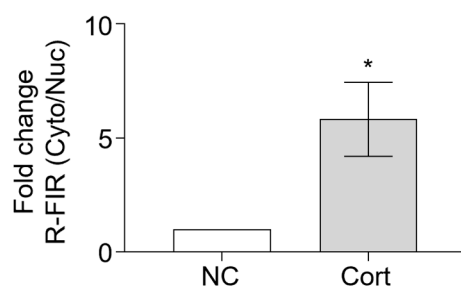

**Figure S5.** Cortisol sensing using HEK293T derived sensor cell. HEK293T-derived sensor cells successfully respond to cortisol and data were analyzed by unpaired T-test (\*  $p < 0.05$ ).

**Table S1.** Table of medicinal plants and extraction conditions.

| Common name              | Biological name       | ratio (w/v) <sup>a</sup> | time (h) |
|--------------------------|-----------------------|--------------------------|----------|
| Gogi berry               | Lycium chinense       | 1:10                     | 2.5      |
| Cornelian berry          | Cornus officinalis    | 1:10                     | 3        |
| Black raspberry          | Rubus coreanus        | 1:2                      | 3        |
| Tumeric                  | Curcuma longa         | 1:10                     | 2        |
| Dong-quai                | Angelica gigas        | 1:6                      | 3        |
| Ginseng <sup>b</sup>     | Panax ginseng         | -                        | -        |
| Hasuo                    | Polygonum muliflorum  | 1:12.5                   | 3        |
| Licorice                 | Glycyrrhiza uralensis | 1:10                     | 3        |
| Deer antler <sup>b</sup> | Cervus                | -                        | -        |
| Red ginseng              | Panax ginseng         | 1:10                     | 24       |
| Reishi mushroom          | Ganoderma lucidum     | 1:20                     | 24       |
| Red bean                 | Vigna angularis       | 1:20                     | 24       |
| Onion                    | Allium cepa           | 1:10                     | 12       |
| Garlic                   | Allium sativum        | 1:10                     | 3        |

<sup>a</sup> Ratio of the weight of the natural product and the volume of 70 % ethanol<sup>b</sup> Purchased from Dongguk University Medical Center (Goyang, Korea)
